# Supplementary material
Source: Research Square preprint supplement (doi:10.21203/rs.3.rs-9909957/v1)
Supplement: Supplementary file 1 [file 7f636be099bd33baaa2e268e.pdf]

# Supplementary Information

## Cooperative Reconstructive Epitaxy of MoS<sub>2</sub> Monolayers in a Multi-Wafer MOCVD Process Guided by In-Situ Process Monitoring

Michael Curtis<sup>1</sup>, Mayukh Das<sup>2</sup>, Merve Baksi<sup>3</sup>, Stiven Forti<sup>4</sup>, Antonio Rossi<sup>4</sup>, Li-Syuan Lu<sup>5</sup>, David Sanchez<sup>6</sup>, Danilo Nagaoka<sup>6</sup>, Tony Valayil Varghese<sup>1</sup>, Kurt Eyink<sup>7</sup>, Ly D. Tran<sup>7</sup>, Krishnendu Mukhopadhyay<sup>2</sup>, Mangesh Diware<sup>8</sup>, Ashton Enriques<sup>8</sup>, Nick Glavin<sup>7</sup>, Christof Mauder<sup>9</sup>, Alexander Henning<sup>9</sup>, Mauricio Terrones<sup>6</sup>, Joshua Robinson<sup>5</sup>, Paul J. Simmonds<sup>3</sup>, Camilla Coletti<sup>4</sup>, Salim El Kazzi<sup>9</sup>, Saptarshi Das<sup>10</sup>, David Estrada<sup>1,\*</sup>

*1. Micron School of Materials Science and Engineering, Boise State University, Boise, ID, 83725*

*2. Engineering Science and Mechanics, The Pennsylvania State University, University Park, PA 16802*

*3. Electrical & Computer Engineering, Tufts University, Medford, MA 02155*

*4. Center for Nanotechnology Innovation, Istituto Italiano di Tecnologia, Piazza San Silvestro 12, Pisa, 56127, Italy*

*5. Materials Science and Engineering, The Pennsylvania State University, University Park, PA 16802*

*6. Department of Physics, The Pennsylvania State University, University Park, PA, 16802*

*7. Air Force Research Laboratory, Materials and Manufacturing Directorate, Wright-Patterson Air Force Base, Ohio 45433*

*8. Park Systems Inc., Burlington, MA 01803*

*9. AIXTRON SE, Dornkaulstr 2, 52134 Herzogenrath, Germany*

*10. Department of Materials Science and Engineering, The Pennsylvania State University, University Park, PA, 16802*

*\*Corresponding Author: [daveestrada@boisestate.edu](mailto:daveestrada@boisestate.edu)*

### Table of Contents:

1. Sapphire annealing study
2. RHEED analysis of sapphire and MoS<sub>2</sub>
3. Plot of process temperature and in-situ photoreflectance response
4. Raw TEM cross-sections
5. Additional annealing studies with increased step bunching
6. Additional TEM
7. Additional C-AFM
8. Additional Raman and GI-XRD measurements of the MoS<sub>2</sub>
9. Device cross-sectional schematic
10. Table of benchmark values
11. Preliminary data on additional TMD layers

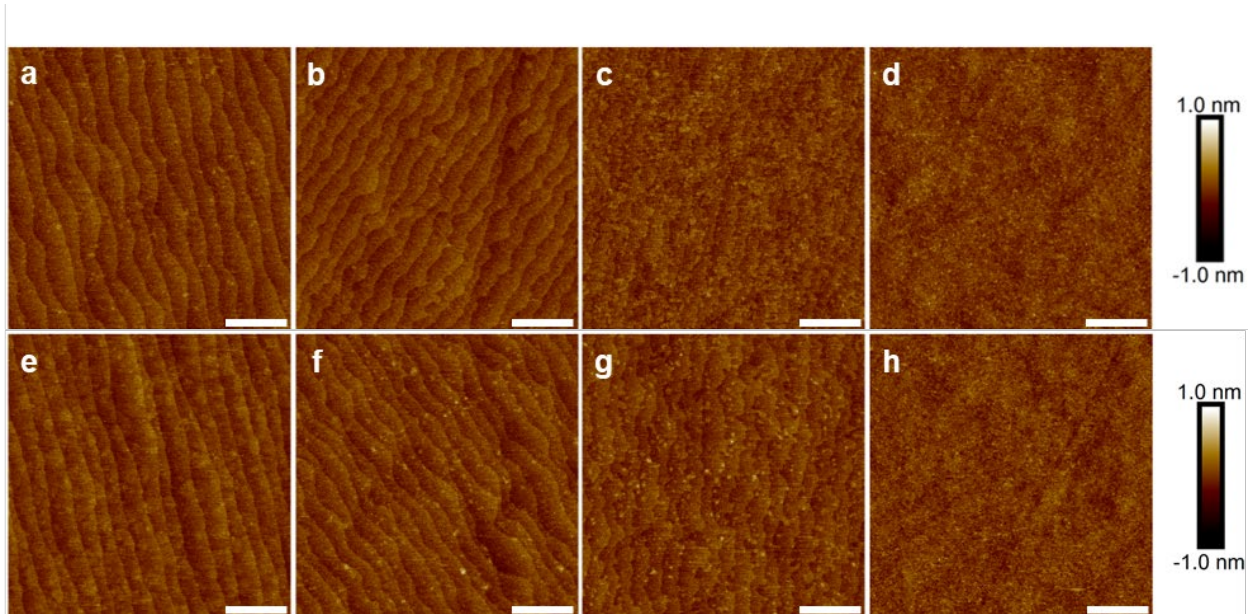

42

43

44 **a – d**, 1×1 μm<sup>2</sup> AFM micrographs of sapphire surfaces annealed under H<sub>2</sub> only at 1000, 900,  
45 800, and 700 °C, respectively. **e – h**, Sapphire surfaces annealed under H<sub>2</sub>S at the same  
46 temperatures. All scale bars are 200 nm.

47

48

49

50

51

52

53

54

55

56

57

58

59

60

61

62

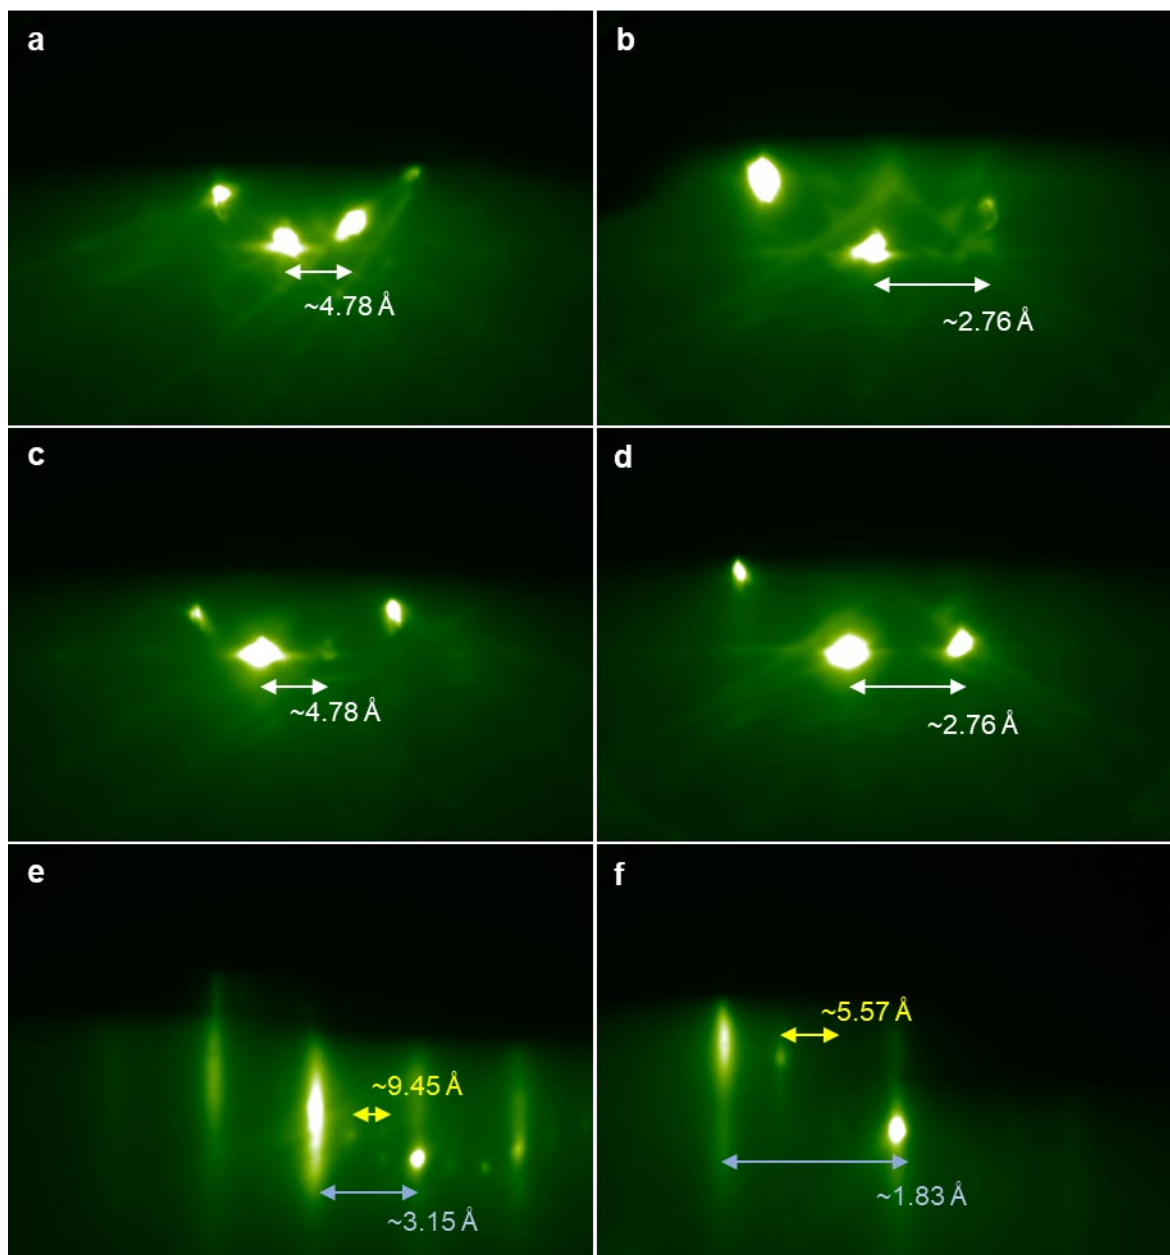

64

65 RHEED patterns from a c-plane sapphire substrate after annealing in  $\text{H}_2$  for 30 minutes,  
 66 measured along **a**, the [112-0] direction and **b**, the [101-0] direction. RHEED patterns from a c-  
 67 plane sapphire substrate after annealing in  $\text{H}_2$  for 15 minutes followed by 15 minutes in  
 68  $\text{H}_2/\text{H}_2\text{S}$ , measured along **c**, the [112-0] direction and **d**, the [101-0] direction. RHEED patterns  
 69 from a  $\text{MoS}_2$  monolayer grown on c-plane sapphire, measured along **e**, the [112-0] direction  
 70 and **f**, the [101-0] direction. White and blue arrows indicate spacing of diffraction features  
 71 related to sapphire and monolayer  $\text{MoS}_2$  respectively, converted to real space distances.  
 72 Yellow arrows indicate spacing of features related to the  $\text{MoS}_2$ /sapphire superlattice.

73

74

75

76

77  
78  
79

### Supplementary Figure 3

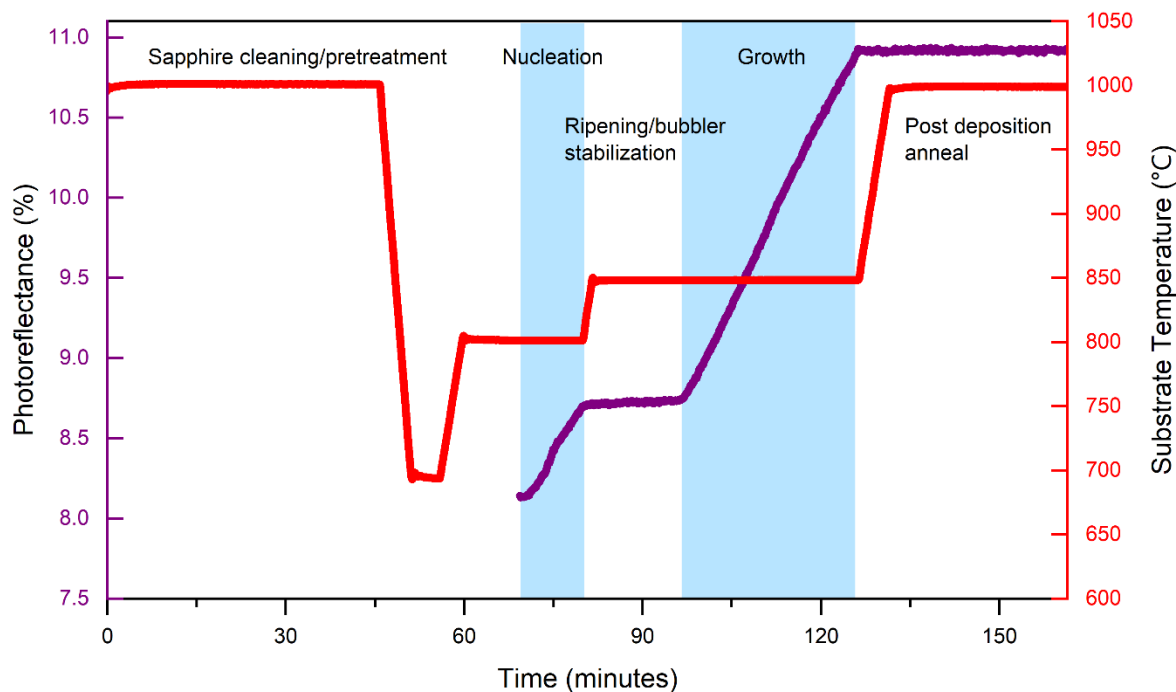

80  
81  
82  
83  
84  
85  
86  
87  
88  
89  
90  
91  
92  
93  
94  
95  
96  
97  
98  
99  
100  
101  
102  
103  
104  
105  
106  
107

In-situ photoreflectance (violet line) and substrate temperature (red line) from sapphire pretreatment and nucleation through TMD growth to reflectance endpoint and post-deposition anneal. Light blue stages, annotated “Nucleation” and “Growth”, indicate when the MCO bubbler is open to the reactor. H<sub>2</sub>S opens 15 minutes into pretreatment and is then constant throughout the rest of the process. The EpiTT photoreflectance measurement is calibrated to the substrate after completion of the pretreatment just before nucleation; photoreflectance readings prior to this have no meaning and are omitted.

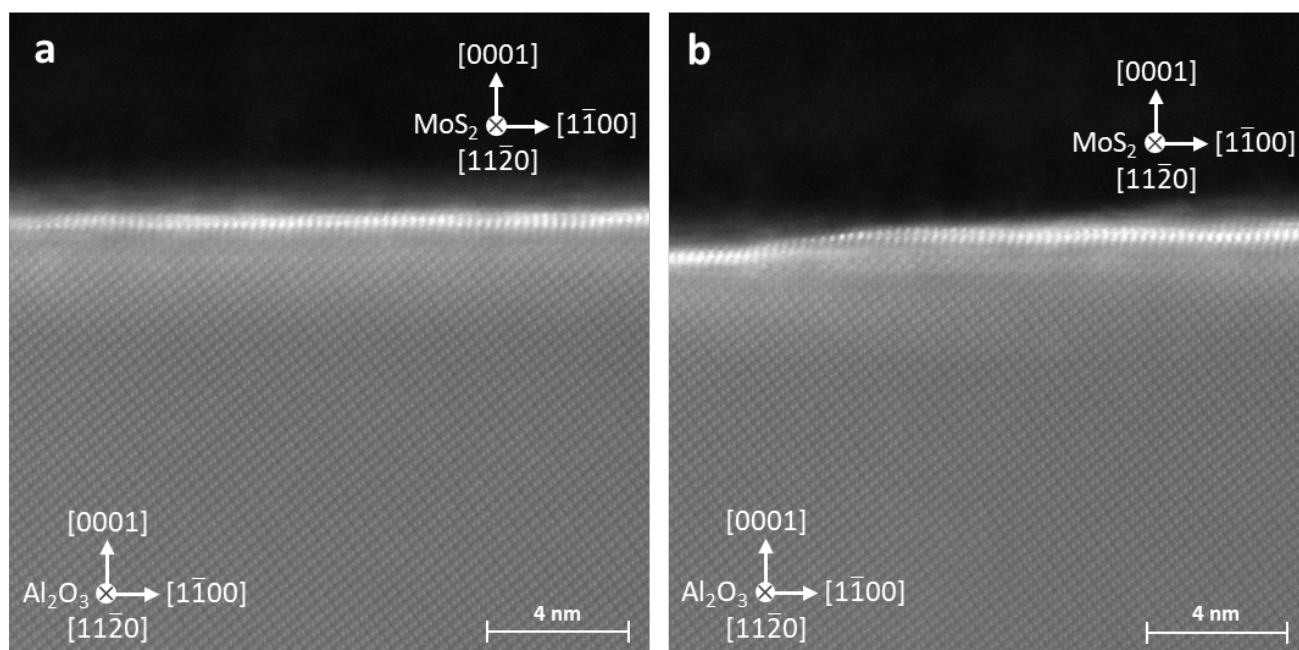

110

111 **a**, Raw cross-sectional HAADF-STEM images of MoS<sub>2</sub> monolayer deposited on the sapphire  
112 substrate and **b**, over the sapphire terrace step, both observed along [11̄20].

113

114

115

116

117

118

119

120

121

122

123

124

125

126

127

128

129

130

131

132

133

134

135

136

137

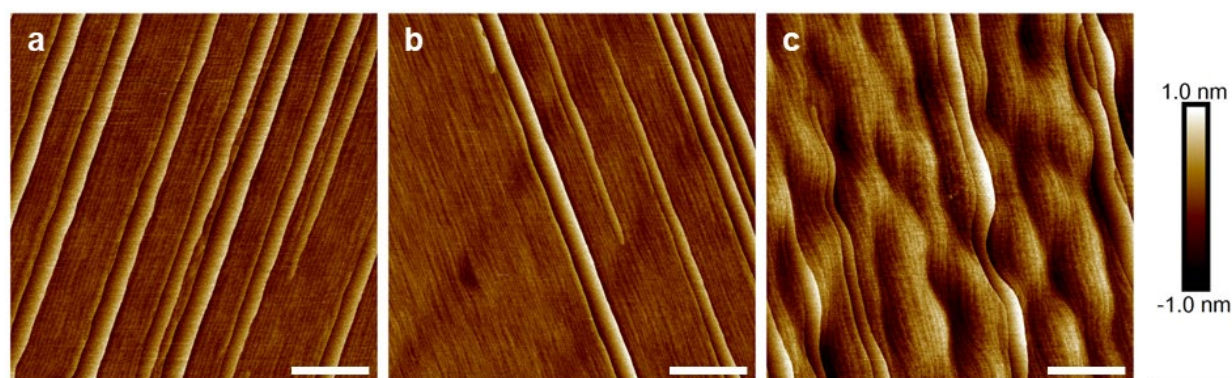

139

140 **a**,  $5 \times 5 \mu\text{m}^2$  AFM micrograph of sapphire surface after extended hydride anneal of 45 minutes  
141 at  $1000^\circ\text{C}$  (rather than the standard 15 minutes). **b**, Sapphire surface after standard 15 minute  
142 anneal but at increased temperature of  $1100^\circ\text{C}$ . In both a and b, the bunched steps are larger  
143 than double steps. **c**, Sapphire surface after standard 15 minute anneal but at increased  
144 temperature of  $1200^\circ\text{C}$ . All scale bars  $1 \mu\text{m}$ .

145

146

147

148

149

150

151

152

153

154

155

156

157

158

159

160

161

162

163

164

165

166

167

168

169

170

171

172

173

174

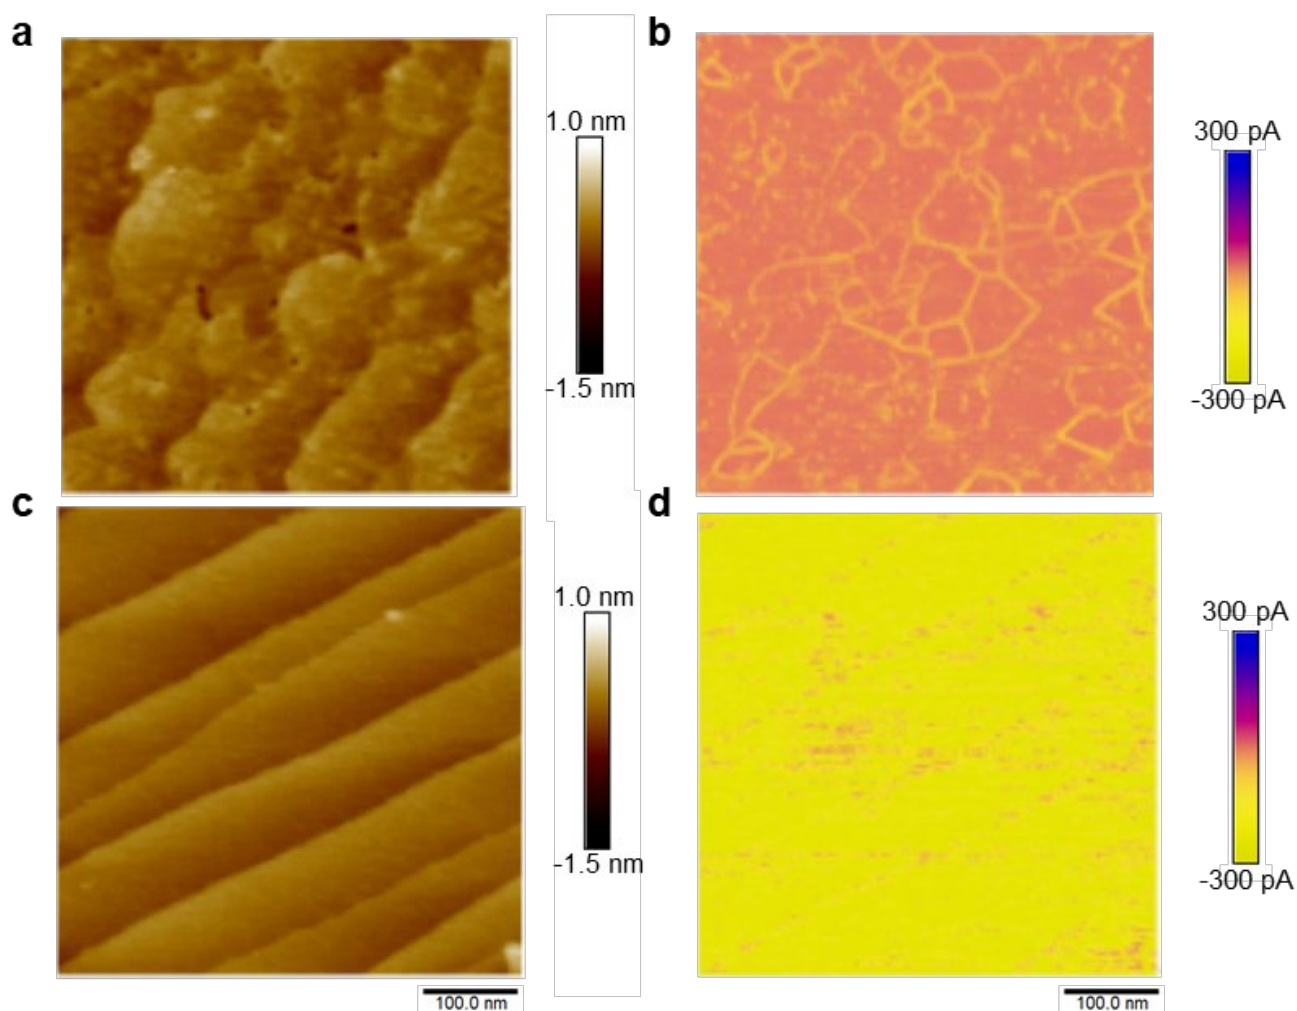176  
177

178 **a**, 500 x 500 nm<sup>2</sup> AFM topography of MoS<sub>2</sub> layer that did not undergo PDA. **b**, Co-localized C-  
179 AFM micrograph of current measurement for region in panel a taken with a -1V sample bias. **c**,  
180 500 x 500 nm<sup>2</sup> AFM topography of MoS<sub>2</sub> layer that underwent PDA after growth. **d**, Co-  
181 localized C-AFM micrograph of current measurement for region in panel c taken with a -1V  
182 sample bias. For the MoS<sub>2</sub> sample that had the PDA treatment the limiting current is around -  
183 230 pA, an order of magnitude higher than the MoS<sub>2</sub> layer without PDA treatment.

184 Supplementary Figure 7

185

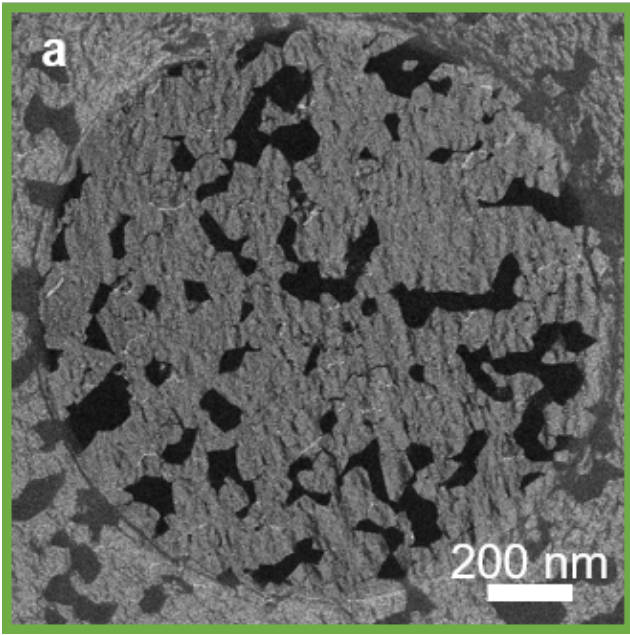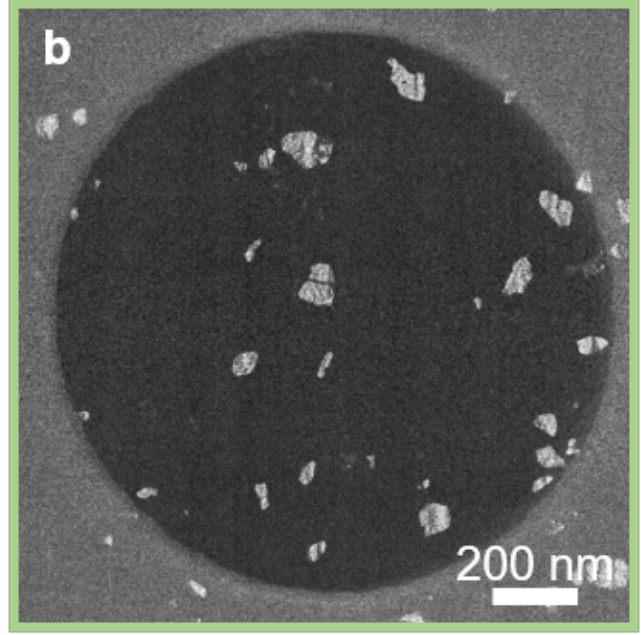

186

187 Additional dark field TEM of the MoS<sub>2</sub> monolayer grown without a PDA treatment on **e**,  
188 oriented and **f**, misoriented 11 $\bar{2}$ 0 spots.

189

190

191

192

193

194

195

196

197

198

199

200

201

202

203

204

205

206

207

208

209

210

211

212

213

214

215

216

217  
218  
219  
220  
221  
222  
223  
224  
225  
226  
227  
228  
229

Supplementary Figure 8

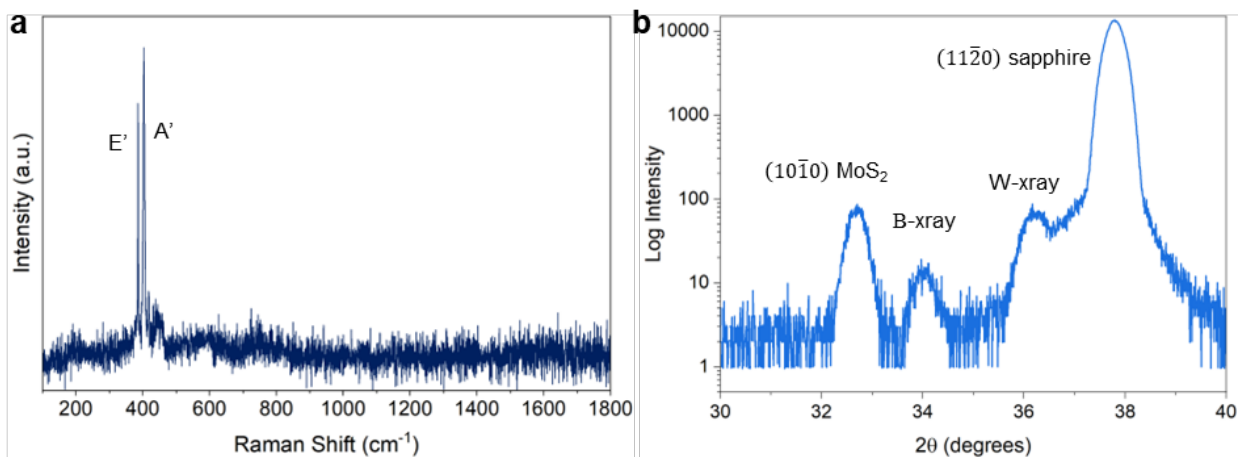

230

231 **a**, Raman spectroscopy of a MoS<sub>2</sub> monolayer from 200–1800 cm<sup>-1</sup> shows only the E' and A'  
232 peaks associated with MoS<sub>2</sub>, and no indication of carbon related peaks. **b**, **in-plane** XRD  
233 shows the expected (1 0 -1 0) peak for MoS<sub>2</sub> and (1 1 -2 0) peak for the c-plane sapphire  
234 substrate.

235  
236  
237  
238  
239  
240  
241  
242  
243  
244  
245  
246  
247  
248  
249  
250  
251

252  
253  
254  
255  
256  
257  
258  
259  
260  
261  
262  
263  
264

Supplementary Figure 9

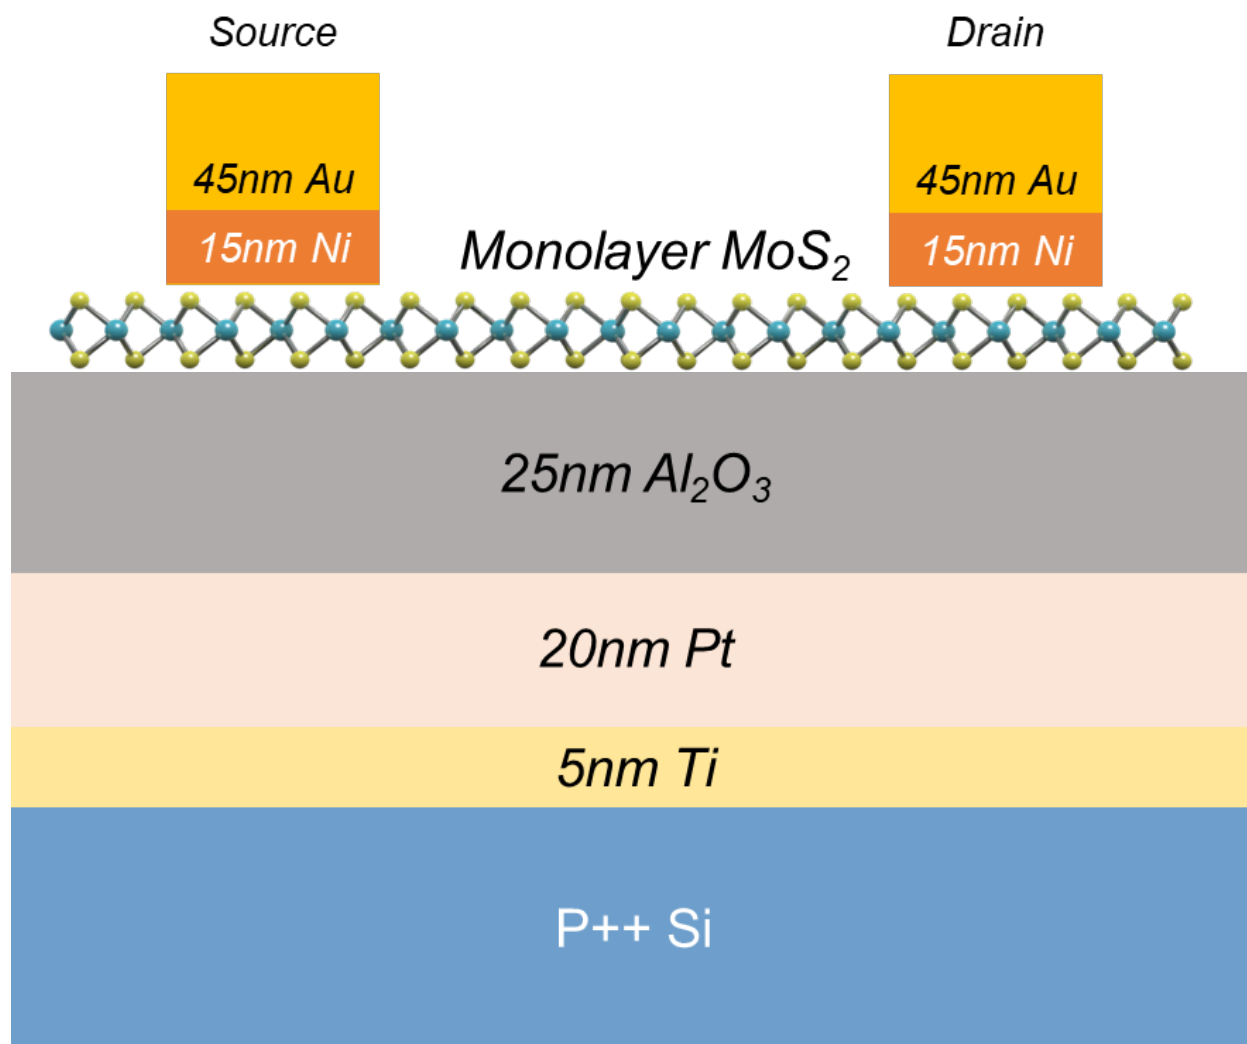

265  
266

267 Cross sectional device schematic for back-gated MoS<sub>2</sub> FETs.

268  
269  
270

271  
272  
273  
274  
275  
276  
277  
278  
279  
280  
281  
282  
283

Supplementary Table 1

| Ref. | Med. mobility | Max mobility | Med. $I_{on}/I_{off}$ | Max $I_{on}/I_{off}$ | Multi-wafer | substrate                                       | Ex-situ annealing           | Growth Chemistries                                             | Contact materials                                                       | Gate materials                |
|------|---------------|--------------|-----------------------|----------------------|-------------|-------------------------------------------------|-----------------------------|----------------------------------------------------------------|-------------------------------------------------------------------------|-------------------------------|
| 56   | 17.5          | 66           | -                     | $1 \times 10^7$      | No          | c-plane $0.2^\circ \pm 0.1^\circ$ c/m (on-axis) | Yes, 1 hour 1150 °C in air  | $\text{MoO}_2\text{CL}_2 / \text{H}_2\text{S}$                 | 1 nm Ni/30 nm Au source and drain, n <sup>+</sup> Si back gate          | 90 nm $\text{SiO}_2$          |
| 35   | 18            | 40           | $1.6 \times 10^9$     | $2 \times 10^{10}$   | Yes         | c-plane $0^\circ$ (on-axis), $1^\circ$ c/m      | Yes, 1 hour 1175 °C in air  | $\text{Mo}(\text{CO})_6 / \text{H}_2\text{S}$                  | 10 nm Ni/20 nm Pd source and drain, p <sup>+</sup> Si back gate         | 50 nm $\text{SiO}_2$          |
| 25   | 20.5          | -            | $1 \times 10^7$       | -                    | No          | c-plane                                         | No                          | $\text{Mo}(\text{CO})_6 / \text{H}_2\text{S}$                  | 40 nm Ni/ 30 nm Au source and drain, Pt/Ti/p <sup>++</sup> Si back gate | 50 nm $\text{Al}_2\text{O}_3$ |
| 78   | 27            | 30           | -                     | $2.1 \times 10^7$    | No          | c-plane                                         | No                          | $\text{Mo}(\text{CO})_6 / \text{H}_2\text{S}$                  | 40 nm Ni/ 30 nm Au source and drain, Pt/Ti/p <sup>++</sup> Si back gate | 50 nm $\text{Al}_2\text{O}_3$ |
| 19   | -             | 22           | -                     | -                    | No          | Non-specified sapphire                          | Yes, 1100 °C in air         | $\text{Na}_2\text{MoO}_4 / ((\text{C}_2\text{H}_5)_2\text{S})$ | 2 nm Ti/90 nm Au source and drain, n <sup>+</sup> Si back gate          | 270 nm $\text{SiO}_2$         |
| 43   | 25            | 28           | -                     | $1 \times 10^8$      | Yes         | c-plane $1^\circ$ c/a                           | Yes, 1 hour in $\text{H}_2$ | $\text{Mo}(\text{CO})_6 / \text{H}_2\text{S}$                  | 10 nm Ni/20 nm Pd source and drain, p <sup>+</sup> Si back gate         | 50 nm $\text{SiO}_2$          |

284  
285  
286  
287  
288  
289  
290  
291  
292  
293  
294  
295  
296  
297  
298

Data from literature used in benchmarking plots in figure 7 of the main text.

299  
300  
301  
302  
303  
304  
305  
306  
307  
308  
309  
310  
311

Supplementary Figure 10

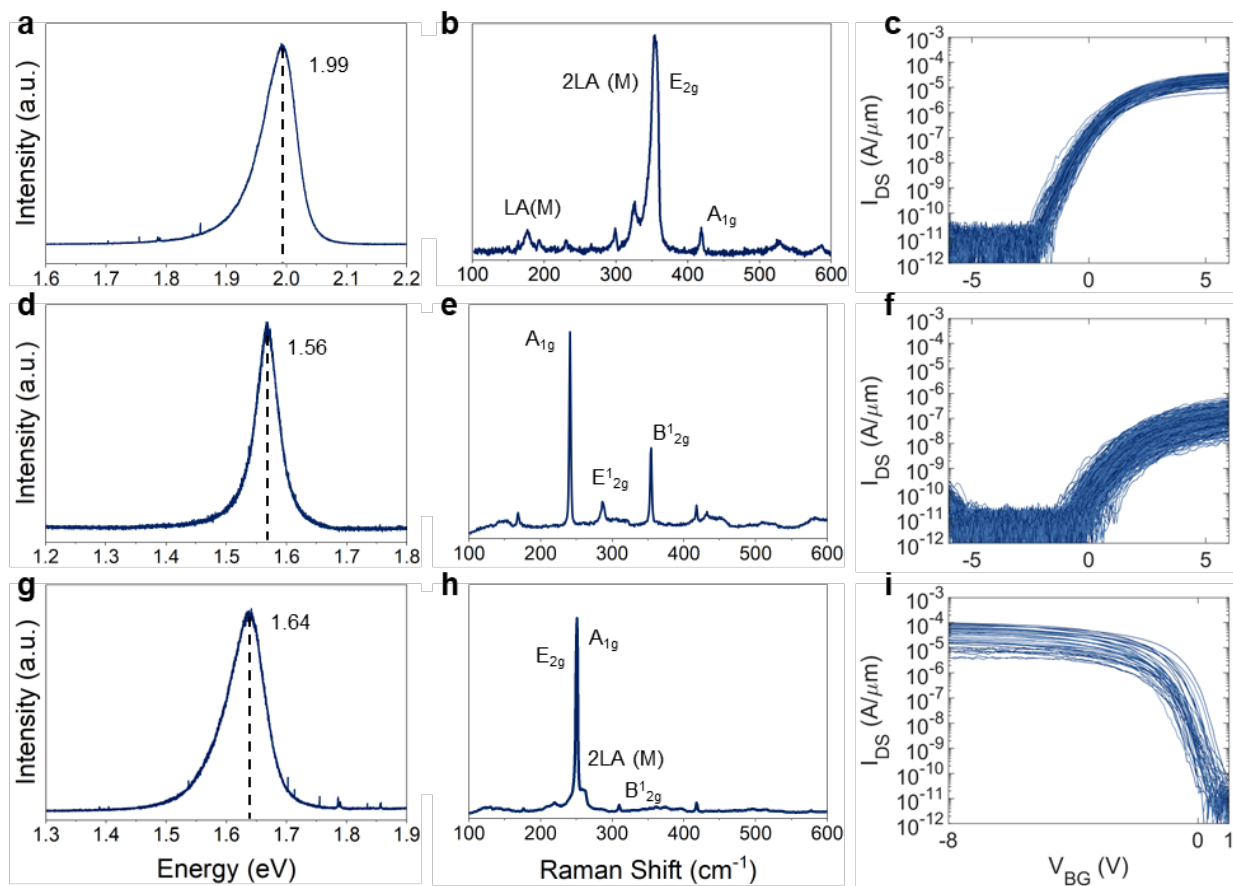

312  
313  
314  
315  
316

**a**, WS<sub>2</sub> PL spectra. **b**, WS<sub>2</sub> Raman spectra. **c**, WS<sub>2</sub> based transistor transfer curves. **d**, MoSe<sub>2</sub> PL spectra. **e**, MoSe<sub>2</sub> Raman spectra. **f**, MoSe<sub>2</sub> based transistor transfer curves. **g**, WSe<sub>2</sub> PL spectra. **h**, WSe<sub>2</sub> Raman spectra. **i**, WSe<sub>2</sub> based transistor transfer curves.
